# Supplementary material
Source: publisher site journal article supplement (https://www.dovepress.com/article/473081)
Supplement: Supplementary file 1 [file get_supplementary_file.php]

**Supplementary material**

**eDocument 1.** The formation of exercise program

**eTable 1.** Modified amateur exercise volume questionnaire

**eTable 2.** Subgroup analysis of main outcome changes in the intervention group

**eTable 3.** Covariate analysis of general data of age, marital status and history of trauma for the difference of the main outcomes between intervention and control groups

**eTable 4.** Attendance to the exercise intervention

**eTable 5.** Adverse effects during intervention

**eFigure 1** QR code link for the exercise intervention atlases and videos

**eDocument 1. The formation of exercise program**

The exercise program in this study was adopted and modified from the published exercise protocol used for cachectic cancer patients developed by Naito et al1. The physical condition of community patients with sarcopenia might be different from that of cachectic cancer patients, so some adjustments were made in the protocol based on a literature review in conjunction with group discussion, expert consultation, and pilot study.

**The first draft of the exercise program**

**——modifications from current literature**

The original adopted exercise protocol was modified to form the first draft of the program. The modifications were made through research team discussion by taking into account the characteristics of community-dwelling older adults with sarcopenia. The modifications were as follows.

**(1) Added resistance exercise movements of the upper limbs**

The original protocol lacked resistance exercise movements of the upper limbs. Therefore, two upper limb resistance exercise movements (straight arm lift and chest-expanding exercise) were added for a more comprehensive exercise program.

**(2) Modified resistance exercise load**

In the original program, the load of resistance exercise was set to be 1 kg. With upper limb resistance exercise movements added in our program, the loads were changed to be 0.5 kg and 1 kg for each side of the upper and lower limbs respectively. Additionally, considering the physical fitness of community-dwelling older adults with sarcopenia might be better, the loads were increased 0.5 kg on each side when necessary for adjustment and no limit on maximal load was set.

**(3) Set continuous walking time**

In the original program, the number of walking steps and time were recorded for all the walking activity no matter of continuous or not. The America College of Sports Medicine (ACSM) recommends that aerobic exercise should last for at least 10 minutes at a time 2. Therefore, aerobic walking exercise in our program was defined as at least 10 minutes of continuous walking, and the walking steps involved were thereby defined as effective walking steps.

**(4) Modified exercise frequency**

The original exercise protocol consisted of daily resistance exercise and walking exercise. For the aerobic walking exercise, the days that met the target steps per week were not required, but rather, the daily steps was recorded to encourage participants to achieve the target steps per day. In our program, the frequency of resistance exercise was modified to three times per week on alternate days, and for aerobic walking participants were required to achieve the target steps five days per week.

**The revised draft of the exercise program**

**——modifications based on expert consultation**

The first draft of the program was subjected to expert consultation, through that a revised version of the program was formed. The modifications were as follows.

**(1) Set the exercise movement sequence**

The experts recommended that exercise should be performed with the proximal joint before the distal joint, so the sequence of exercise movements was defined as hip and shoulder, knee, elbow, ankle and wrist.

**(2) Added warm-up and cool-down exercise**

The experts recommended adding warm-up and cold-down exercise for greater safety and effectiveness. The warm-up exercise included shoulder wrap, waist wrap, knee wrap, and ankle wrap. Cool-down exercise included stretching of the front side of the lower arm, the front side of the thigh, and the back side of the calf.

**(3) Monitored the intensity of aerobic walking exercise**

To ensure the appropriate exercise intensity and safety, participants accepted instructions on the methods for self-measurement of rating of perceived exertion (RPE) and heart rate (HR). The exercise with a RPE score of 12-14 and a HR of 60-80% HRmax were considered to be appropriate.

**The final draft of the exercise program**

**——modifications based on pilot study**

A pilot study was conducted with the revised version of the exercise program. Additional modifications were made based on the pilot study results to derive the final draft of the program.

**Method**

Ten older adults with sarcopenia of different ages and sexes were selected for a 12-week intervention using the revised draft of the exercise program in a community health center in Suzhou, China. The procedure of the pilot study was the same as the one in the main text.

**Results**

(1) *Adherence*

Seven individuals participated in resistance exercise and aerobic walking exercise for 12 weeks and three dropped out due to personal reasons. The completion degree of resistance exercise movements was 71%. In aerobic exercise, only 4 participants met the target steps of walking exercise for 12 weeks, giving a completion degree of target steps of 36%.

(2) *Physical fitness*

The 30s biceps curl was significantly larger after intervention (*P*0.05). Other physical fitness indicators, except for balance indicators, had an increasing trend without statistical significance (*P* > 0.05). The muscle mass indicators showed an increasing trend, and the fat indicators showed a decreasing trend, but no statistical significance was found (*P* > 0.05).

(4) *Adverse events*

No adverse events occurred during the intervention period. Some participants had soreness and fatigue at the initial period of resistance exercise, but these did not affect their daily life. With the extension of exercise time, the soreness and fatigue gradually disappeared.

(5) *Subjective feedback*

Participants provided positive feedback about the exercise in both physiological and psychological experience feelings, and participants felt reassured by the scientific exercise guidance from the researchers and novelty of the pedometer, and these increased their interest in exercise.

Some participants provided feedback about the difficulties during the intervention. In resistance exercise, two participants were unable to complete sit-to-stand movements as required due to knee osteoarthritis. Two participants with level 4 of exercise had RPE higher than the prescribed range (12~14) after weight-bearing exercise. In aerobic walking exercise, four participants reported excessive daily walking after upgrading, which resulted in leg soreness and lower back discomfort.

**Conclusion**

(1) The overall attendance and completion of resistance exercise are good, but the completion of target steps in aerobic walking exercise is low.

(2) The exercise program causes improvement in upper limb strength, but no significant improvement in other physical fitness indicators.

(3) The exercise program is safe and practical, whereas attentions should be paid to keep suitable intensity.

**The modification of the exercise program based on pilot study**

The exercise program was further modified in combination with the adherence and subjective feedback from participants. The modifications were as follows.

(1) For the participants who had difficulty in completing the sit-to-stand movement, this movement was replaced with knee extension if the exercise level was Level 1 (which included only three movements: standing hip flexion, straight arm lift, and sit-to-stand), and the repetitions of sit-to-stand movements were reduced by half (5 repetitions) and the number of groups was reduced from 3 groups to 1 group for those in Level 2 (which included both sit-to-stand and knee extensions and could not be replaced with each other).

(2) In order for participants to better adapt to sandbag weight-bearing and to avoid excessive RPE at the beginning of weight-bearing, participants performed only 2 groups of exercises at the 1st week if their resistance exercise was level 4. At the 2nd week, they started to do 3 groups of exercises.

(3) When the walking exercise level increased, several participants reported difficulty in reaching the increased target steps (2000 steps). Therefore, the target step increase was reduced to 1000 steps for each different level 3.

(4) The completion degree of target steps was low. Therefore, the requirement for the number of days per week to achieve the target steps was reduced to the least of 3 days.

**eTable 1. Modified amateur exercise volume questionnaire**

Please check the exercise program you have done at least 2 times in the past 3 months, check the month you have done it, then fill in the average number of times you exercise per month and the average time you spend exercising each time.

| **Exercise program** | **1** | **2** | **3** | **Times/month** | **Minutes/month** |
| --- | --- | --- | --- | --- | --- |
| 1. Walking (Running stage walking or hiking, traveling, shopping, visiting parks) |  |  |  |  |  |
| 2. Stair climbing |  |  |  |  |  |
| 3. Running |  |  |  |  |  |
| 4. Tai Chi |  |  |  |  |  |
| 5. Yoga |  |  |  |  |  |
| 6. Fishing |  |  |  |  |  |
| 7. Broadcast calisthenics/aerobic gymnastics |  |  |  |  |  |
| 8. Dancing |  |  |  |  |  |
| 9. Resistance training/physical Fitness Training |  |  |  |  |  |
| 10. Swimming |  |  |  |  |  |
| 11. Climbing a mountain |  |  |  |  |  |
| 12. Ping-pong |  |  |  |  |  |
| 13. Basketball |  |  |  |  |  |
| 14. Other_____ |  |  |  |  |  |

**eTable 2.** **Subgroup analysis of main outcome changes in the intervention group**

|  |  | **Knee extensors muscle strength** | | **6MWD** | |
| --- | --- | --- | --- | --- | --- |
|  |  | ***t*** | ***P*** | ***t*** | ***P*** |
| Age | ＜75 | -0.809 | 0.424 | -0.041 | 0.967 |
| ＞75 |
| Marital status | married | 0.277 | 0.784 | 0.554 | 0.583 |
| other |
| History of trauma | yes | -0.063 | 0.95 | -0.266 | 0.792 |
| no |

**eTable 3. Covariate analysis of general data of age, marital status and history of trauma for the difference of the main outcomes between intervention and control groups**

| **Dependent variable** | **Concomitant variable** | | | | | |
| --- | --- | --- | --- | --- | --- | --- |
| **Age** | | **Marital status** | | **History of trauma** | |
|  | *F* | *P* | *F* | *P* | *F* | *P* |
| Knee extensors muscle strength | 0.994 | 0.322 | 3.321 | 0.073 | 1.203 | 0.276 |
| 6MWD | 1.969 | 0.165 | 2.505 | 0.118 | 0.143 | 0.707 |

**eTable 4. Attendance to the exercise intervention**

**Attendance to the exercise intervention [*n* (%)]**

| **Item** | **Screening period** | **1st ~4th week** | **5th ~ 8th week** | **9th ~12th week** |
| --- | --- | --- | --- | --- |
| **Resistance training** |  |  |  |  |
| Drop out | 1a (2.4) | 0 | 4b (9.8) | 2c (4.9) |
| Resume | 0 | 0 | 0 | 1d (2.4) |
| **Aerobic walking exercise** |  |  |  |  |
| Drop out | 1a (2.4) | 0 | 4b (9.8) | 1e (2.4) |
| Resume | 0 | 0 | 0 | 1d (2.4) |

Note: the reasons for the drop out or resume were as follows.

a (I) dropped out during the screening period because of moving away.

b (Ⅱ) had shingles, (Ⅲ) proactively requested withdrawal, (IV) was hospitalized, (V) sickness in families.

c (ⅤI) was reluctant to continue resistance exercise, (VⅡ) had lumbar disc herniation.

d (VⅢ) disease recovery in the families so the participant could continue to exercise.

e (IX) refused to continue wearing the pedometer.

**eTable 5. Adverse effects during intervention**

**Adverse effects during intervention**

| **Item** | **Soreness area** | **Related chronic diseases** | **Appearance Period** | **Measures** | **Recovery period** |
| --- | --- | --- | --- | --- | --- |
| 1 | Knee | Knee osteoarthritis | 1st ~4th week | Replaced sit-to-stand with knee extension | 9th ~12th week |
| 2 | Knee | Knee osteoarthritis | 5th ~8th week | Replaced sit-to-stand with knee extension | 9th ~12th week |
| 3 | Low back | / | 5th ~8th week (started weight-bearing) | / | After one week of weight bearing |
| 4 | Shoulders | Frozen shoulder | 1st ~4th week | Lowered the shoulder lift | One week later |
| 5 | Calf | / | 1st ~4th week | Reduce the exercise frequency to 1~2 times per week during 1st ~4th week | One week later |
| 6 | Calf | / | 9st ~12th week (started weight-bearing) | Weight-bearing only once a week | One week later |

**eFigure 1.** **QR code link for the exercise intervention atlases and videos**


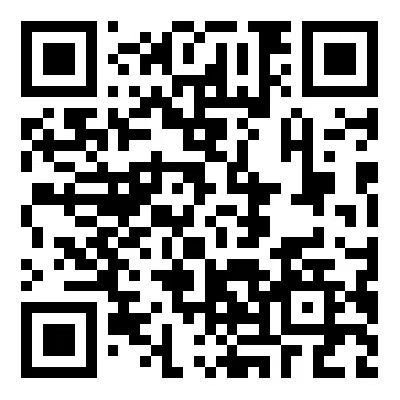


**Reference**

1. Naito T, Mitsunaga S, Miura S, et al. Feasibility of early multimodal interventions for elderly patients with advanced pancreatic and non-small-cell lung cancer. *J Cachexia Sarcopenia Muscle*. 2019;10(1):73-83.

2. Magal D. ACSM'S Guidelines for Exercise Testing and Prescription Tenth Edition2018. p.472.

3. Tudor-Locke C, Hart TL, Washington TL. Correction: Expected values for pedometer-determined physical activity in older populations. *Int J Behav Nutr Phys Act*. 2009;6:65.
